# Supplementary material for: Association between HOTAIR lncRNA Polymorphisms and Coronary Artery Disease Susceptibility
Source: MDPI journal article supplement (doi:10.3390/jpm11050375), 2021-05-04
Supplement: s1 [file s1]

Table S1. Details of *HOTAIR* polymorphisms for PCR-RFLP analysis

| rs number |         | primer                                     | Restriction enzyme |
|-----------|---------|--------------------------------------------|--------------------|
| rs1899663 | forward | 5'- TTT TCC AGT TGA GGA GGG TGG A -3'      | <i>Hph</i> I       |
|           | reverse | 5'- CTA ATG GCA AGG GAA GGG AAG G -3'      |                    |
| rs4759314 | forward | 5'- ACC CAA AAC CAT TTC CTG AGA G -3'      | <i>Alu</i> I       |
|           | reverse | 5'- TTC AGG TTT TAT TAA CTT GCA TCA GC -3' |                    |
